# Supplementary material
Source: publisher figshare collection journal article supplement (https://karger.figshare.com/ndownloader/files/31067689)
Supplement: Supplementary file 1 [file 31067689]

**Table S2.** Results of Bonferroni’s post hoc multiple comparison test at February, 2020 (T1) and January, 2021 (T2)

| **Characteristics** | **T1** | | | | **T2** | | | |
| --- | --- | --- | --- | --- | --- | --- | --- | --- |
|  | **Grade 1** | **Grade 2** | **Grade 3** | **Grade 4** | **Grade 1** | **Grade 2** | **Grade 3** | **Grade 4** |
| **Depression** |  |  |  |  |  |  |  |  |
| Grade 1 |  |  |  |  |  |  |  |  |
| Grade 2 | 0.610 |  |  |  | 0.548 |  |  |  |
| Grade 3 | 0.210 | 0.703 |  |  | 0.051 | 0.106 |  |  |
| Grade 4 | **0.005** | 0.142 | 0.841 |  | **0.004** | 0.050 | 0.967 |  |
| **Anxiety** |  |  |  |  |  |  |  |  |
| Grade 1 |  |  |  |  |  |  |  |  |
| Grade 2 | 0.898 |  |  |  | 0.896 |  |  |  |
| Grade 3 | 0.027 | 0.090 |  |  | 0.293 | 0.542 |  |  |
| Grade 4 | **0.008** | 0.055 | 0.999 |  | 0.049 | 0.108 | 0.787 |  |
| A corrected *p*-value of < 0.0083 was considered statistically signiﬁcant. | | | | | | | | |
